# Supplementary material
Source: publisher site journal article supplement (https://www.dovepress.com/article/405429)

**Supplementary Materials**

**List**

1. Supplementary Tables
2. Supplementary Figures
3. **Supplementary Tables**

**Table S1** The definitions and scoring rules of morphological features

| Feature | Definition | Scoring |
| --- | --- | --- |
| Maximum diameter | Longest diameter of the maximum cross section | Unit, millimeter |
| Minimum Diameter | Vertical diameter of the maximum diameter of tumor | Unit, millimeter |
| Location | Lobe of tumor originated from | 1, LLL; 2, LUL; 3, RLL; 4, RML; 5, RUL; 6, cross lobe |
| Shape | Shape of tumor on the multiplanar reconstructed (MPR) images | 1, irregular; 2, round/oval |
| Density | Mixed ground glass, presence of ground-glass opacity and solid density component; pure ground glass, contains ground glass density components only; solid, absence of ground-glass opacity, contains solid density component only; | 1, mixed ground glass; 2, pure ground glass; 3, solid |
| Interface | Interface of the tumor-lung | 1, ill-defined; 2, well-defined and smooth; 3, well-defined but coarse |
| Marginal characteristics |  |  |
| Lobulation Sign | the surface of the tumor that showed a wavy or scalloped configuration | 0, no; 1, yes |
| Spiculation Sign | Short lines radiating from the margin of the tumor | 0, no; 1, yes |
| Spine-like process | Thick protuberance between lobulation and spiculation on the surface of the tumor, which can be dendritic, finger-like or blunt triangular. | 0, no; 1, yes |
| Internal characteristics |  |  |
| Vacuole sign | A small cavity or space of 1-2mm in the tumor, referring to lung tissue not invaded by the tumor | 0, no; 1, yes |
| Cavity sign | A larger cavity or space (>5mm) in the tumor because of intratumoral necrosis | 0, no; 1, yes |
| Cystic Airspace | A large thin-walled cystic lesion (>5mm) in the tumor because of the expansion of lung structure | 0, no; 1, yes |
| Calcification | Calcification in the tumor | 0, no; 1, yes |
| Bronchus Cutoff Sign | A sudden interruption of the bronchus within the tumor | 0, no; 1, yes |
| Bronchus dilation/distortion | Twisted and dilated bronchi within the tumor | 0, no; 1, yes |
| External characteristics |  |  |
| Pleural indentation sign | Retraction of the pleura toward the tumor | 0, no; 1, yes |
| Vascular convergence sign | Convergence of vessels to the tumor | 0, no; 1, yes |
| Bronchial Wall Thickening | Uniform thickening of bronchial walls in more than half of the entire lung | 0, no; 1, yes |
| ELLC | Presence of emphysema in the lobe of lung cancer with visual observation | 0, no; 1, yes |
| ERL | Presence of emphysema in the remaining lobes with visual observation | 0, no; 1, yes |

Abbreviations: LLL, left lower lobe; LUL, left upper lobe; RLL, right lower lobe; RML, right middle lobe; RUL, right upper lobe; ELLC, emphysema in the lobe of lung cancer; ERL, emphysema in the remaining lobes.

**Table S2** Differences of clinical variables between patients from the two hospitals

| Variable |  | Hospital 1 (n = 444) | Hospital 2 (n = 54) | P value |
| --- | --- | --- | --- | --- |
| Age (year) |  | 63.00±12 | 61.00±12 | 0.149 |
| Sex |  |  |  | 0.036 |
|  | Male | 279(62.84) | 26(48.15) |  |
|  | Female | 165(37.16) | 28(51.85) |  |
| Smoking status |  |  |  | 0.002 |
|  | Never smoker | 255(57.43) | 38(70.37) |  |
|  | Current Smoker | 145(32.66) | 6(11.11) |  |
|  | Former Smoker | 44(9.91) | 10(18.52) |  |
| Family History of Lung Cancer |  |  |  | 0.672 |
|  | No | 431(97.07) | 52(96.30) |  |
|  | Yes | 13(2.93) | 2(3.70) |  |
| BMI (kg/m2) |  | 23.61±2.90 | 23.39±2.92 | 0.601 |
| VC (L) |  | 2.88±0.92 | 2.96±0.74 | 0.486 |
| FEV1 (L) |  | 2.06±0.03 | 2.17±0.09 | 0.231 |
| FVC (L) |  | 2.90±0.03 | 2.94±0.10 | 0.752 |
| FEV1%pred |  | 81.02±1.02 | 85.12±2.75 | 0.182 |
| FEV1/ FVC (%) |  | 68.75±16.97 | 75.92±13.14 | 0.093 |
| MEF25 (L/s) |  | 0.52±0.51 | 0.54±0.51 | 0.988 |

Abbreviations: BMI, body mass index; VC, vital capacity; FEV1, forced expiratory volume in one second; FVC, forced vital capacity; FEV1%pred, the percentage of FEV1 to the predicted value; FEV1/FVC, ratio of FEV1 to FVC; MEF25, maximum expiratory flow at 25% of the FVC.

**Table S3** Comparison of histological subtypes of lung cancer between non-COPD and COPD groups

| Histological subtype | Training cohort (n=349) | | | |  | Validation cohort (n=149) | | | |
| --- | --- | --- | --- | --- | --- | --- | --- | --- | --- |
| Non-COPD  (n=158) | COPD  (n=191) | Fisher value | P-value |  | Non-COPD  (n=60) | COPD  (n=89) | Fisher value | P-value |
| Adenocarcinoma | 142(89.87) | 125(65.45) | 34.831 | <0.001 |  | 52(86.67) | 57(64.04) | 9.154 | 0.036 |
| Squamous Cell CarcinomaA | 5(3.16) | 42(21.99) |  | 5(8.33) | 19(21.35) |
| Small-cell CarcinomaA | 1(0.63) | 9(4.71) |  | 1(1.67) | 5(5.62) |
| Unidentified CancerB | 7(4.43) | 10(5.24) |  | 2(3.33) | 7(7.87) |
| Other Types of Lung Cancer* | 3(1.90) | 5(2.62) |  | 0(0.00) | 1(1.12) |

Note: Data are presented as n, or n (%), except where otherwise noted.

A indicates a significant difference comparing with adenocarcinoma in the training cohort; B indicates a significant difference comparing with squamous cell carcinoma in the training cohort.

*: Other types of lung cancer included 2 adenosquamous carcinoma, 4 large cell carcinoma, 1 mucoepidermoid carcinoma, 1 basal cell like carcinoma and 1 sarcomatoid carcinoma.

**Table S4** Comparison of histological subtypes of lung cancer between non-emphysema and emphysema groups

| Histological subtype | Training cohort (n=349) | | | |  | Validation cohort (n=149) | | | | |
| --- | --- | --- | --- | --- | --- | --- | --- | --- | --- | --- |
| Emphysema absent (n=217) | Emphysema present (n=132) | Fisher value | P-value |  | Emphysema absent (n=94) | Emphysema present (n=55) | Fisher value | P-value | |
| Adenocarcinoma | 186(85.71) | 81(61.36) | 35.819 | <0.001 |  | 87(92.55) | 22(40.00) | 49.055 | | <0.001 |
| Squamous Cell CarcinomaA | 15(6.91) | 32(24.24) |  | 5(5.32) | 19(34.55) |  | | |
| Small-cell CarcinomaA | 1(0.46) | 9(6.82) |  | 0(0.00) | 6(10.91) |  | | |
| Unidentified CancerB | 11(5.07) | 6(4.55) |  | 2(2.13) | 7(12.73) |
| Other Types of Lung Cancer | 4(1.84) | 4(3.03) |  | 0(0.00) | 1(1.82) |

Note: Data are presented as n, or n (%), except where otherwise noted.

A indicates a significant difference comparing with adenocarcinoma in the training cohort; B indicates a significant difference comparing with squamous cell carcinoma in the training cohort.

**Table S5** Histological subtypes of lung cancer originating from areas with emphysema and without emphysema

| Histological subtype | Training cohort(n=349) | | | |  | Validation cohort(n=149) | | | |
| --- | --- | --- | --- | --- | --- | --- | --- | --- | --- |
| Non-emphysematous tissue origin  (n=231) | Emphysematous tissue origin (n=118) | Fisher value | P-value |  | Non-emphysematous tissue origin  (n=99) | Emphysematous tissue origin (n=50) | Fisher value | P-value |
| Adenocarcinoma | 196(84.85) | 71(60.17) | 31.470 | <0.001 |  | 88(88.89) | 21(42.00) | 38.014 | <0.001 |
| Squamous Cell CarcinomaA | 18(7.79) | 29(24.58) |  | 7(7.07) | 17(34.00) |
| Small-cell CarcinomaA | 2(0.87) | 8(6.78) |  | 1(1.01) | 5(10.00) |
| Unidentified Cancer | 11(4.76) | 6(5.08) |  | 3(3.03) | 6(12.00) |
| Other Types of Lung Cancer | 4(1.73) | 4(3.39) |  | 0(0.00) | 1(2.00) |

Note: Data are presented as n, or n (%), except where otherwise noted.

A indicates a significant difference comparing with adenocarcinoma in the training cohort.

**Table S6** Predictive performance of different nomograms in the training and validation cohort

| Model | Cohort | AUC (95%CI) | Threshold* | Sensitivity  (%) | Specificity  (%) | NPV  (%) | PPV  (%) | Accuracy  (%) |
| --- | --- | --- | --- | --- | --- | --- | --- | --- |
| Clinical nomogram + Smoking status | Training cohort | 0.808(0.762-0.855) | 0.574 | 79.06 | 74.05 | 74.52 | 78.65 | 76.79 |
|  | Validation cohort | 0.753(0.674-0.832) | 0.574 | 70.79 | 66.67 | 60.61 | 75.90 | 69.13 |
| Combined nomogram + Smoking status | Training cohort | 0.863(0.823-0.90) | 0.579 | 80.63 | 81.65 | 77.71 | 84.15 | 81.09 |
|  | Validation cohort | 0.811(0.742-0.880) | 0.579 | 69.66 | 76.67 | 63.01 | 81.58 | 72.48 |
| Clinical nomogram + Smoking status + interaction term# | Training cohort | 0.810(0.763-0.856) | 0.576 | 79.58 | 74.05 | 75.00 | 78.76 | 77.08 |
|  | Validation cohort | 0.751(0.672-0.830) | 0.576 | 70.79 | 65.00 | 60.00 | 75.00 | 68.46 |
| Combined nomogram + Smoking status + interaction term# | Training cohort | 0.865(0.826-0.905) | 0.572 | 81.68 | 81.65 | 78.66 | 84.32 | 81.66 |
|  | Validation cohort | 0.802(0.731-0.873) | 0.572 | 69.66 | 76.67 | 63.01 | 81.58 | 72.48 |

*: The threshold here is the optimal threshold point in the training cohort, which is the cut-off value.

#: interaction term: Sex × Smoking status

Abbreviations: AUC, area under the curve; CI, confidence interval; NPV, negative predictive value; PPV, positive predictive value.

**Table S7** Results of Delong test in the training and validation cohort

| Comparison | Training cohort | |  | Validation cohort | |
| --- | --- | --- | --- | --- | --- |
| Ｐ-value | 95%CI |  | Ｐ-value | 95%CI |
| Combined nomogram vs. Clinical nomogram | <0.001 | 0.023-0.089 |  | 0.036 | 0.004-0.106 |
| Combined nomogram vs. Imaging nomogram | 0.002 | 0.018-0.082 |  | 0.282 | -0.026-0.088 |
| Clinical nomogram vs. Imaging nomogram | 0.822 | -0.050-0.061 |  | 0.633 | -0.073-0.121 |

1. **Supplementary Figures**

**Figure S1. Graphical figures of CT morphological features.** (A) A 40-year-old male patient with invasive adenocarcinoma. Transverse lung window shows a 34mm mass with spiculation sign (SS), pleural indentation sign (PIS) and bronchus cutoff sign (BCS) in the left upper lobe. (B) A 68-year-old male patient with invasive adenocarcinoma. Transverse lung window shows mild emphysema and a solid-density mass with coarse interface, lobulation sign (LS) and cavity sign (CS) in the right lower lobe. (C) A 70-year-old male patient with invasive adenocarcinoma. Transverse lung window shows emphysema and a coarse mass with SS, spine-like process (SP) and BCS in the left upper lobe.


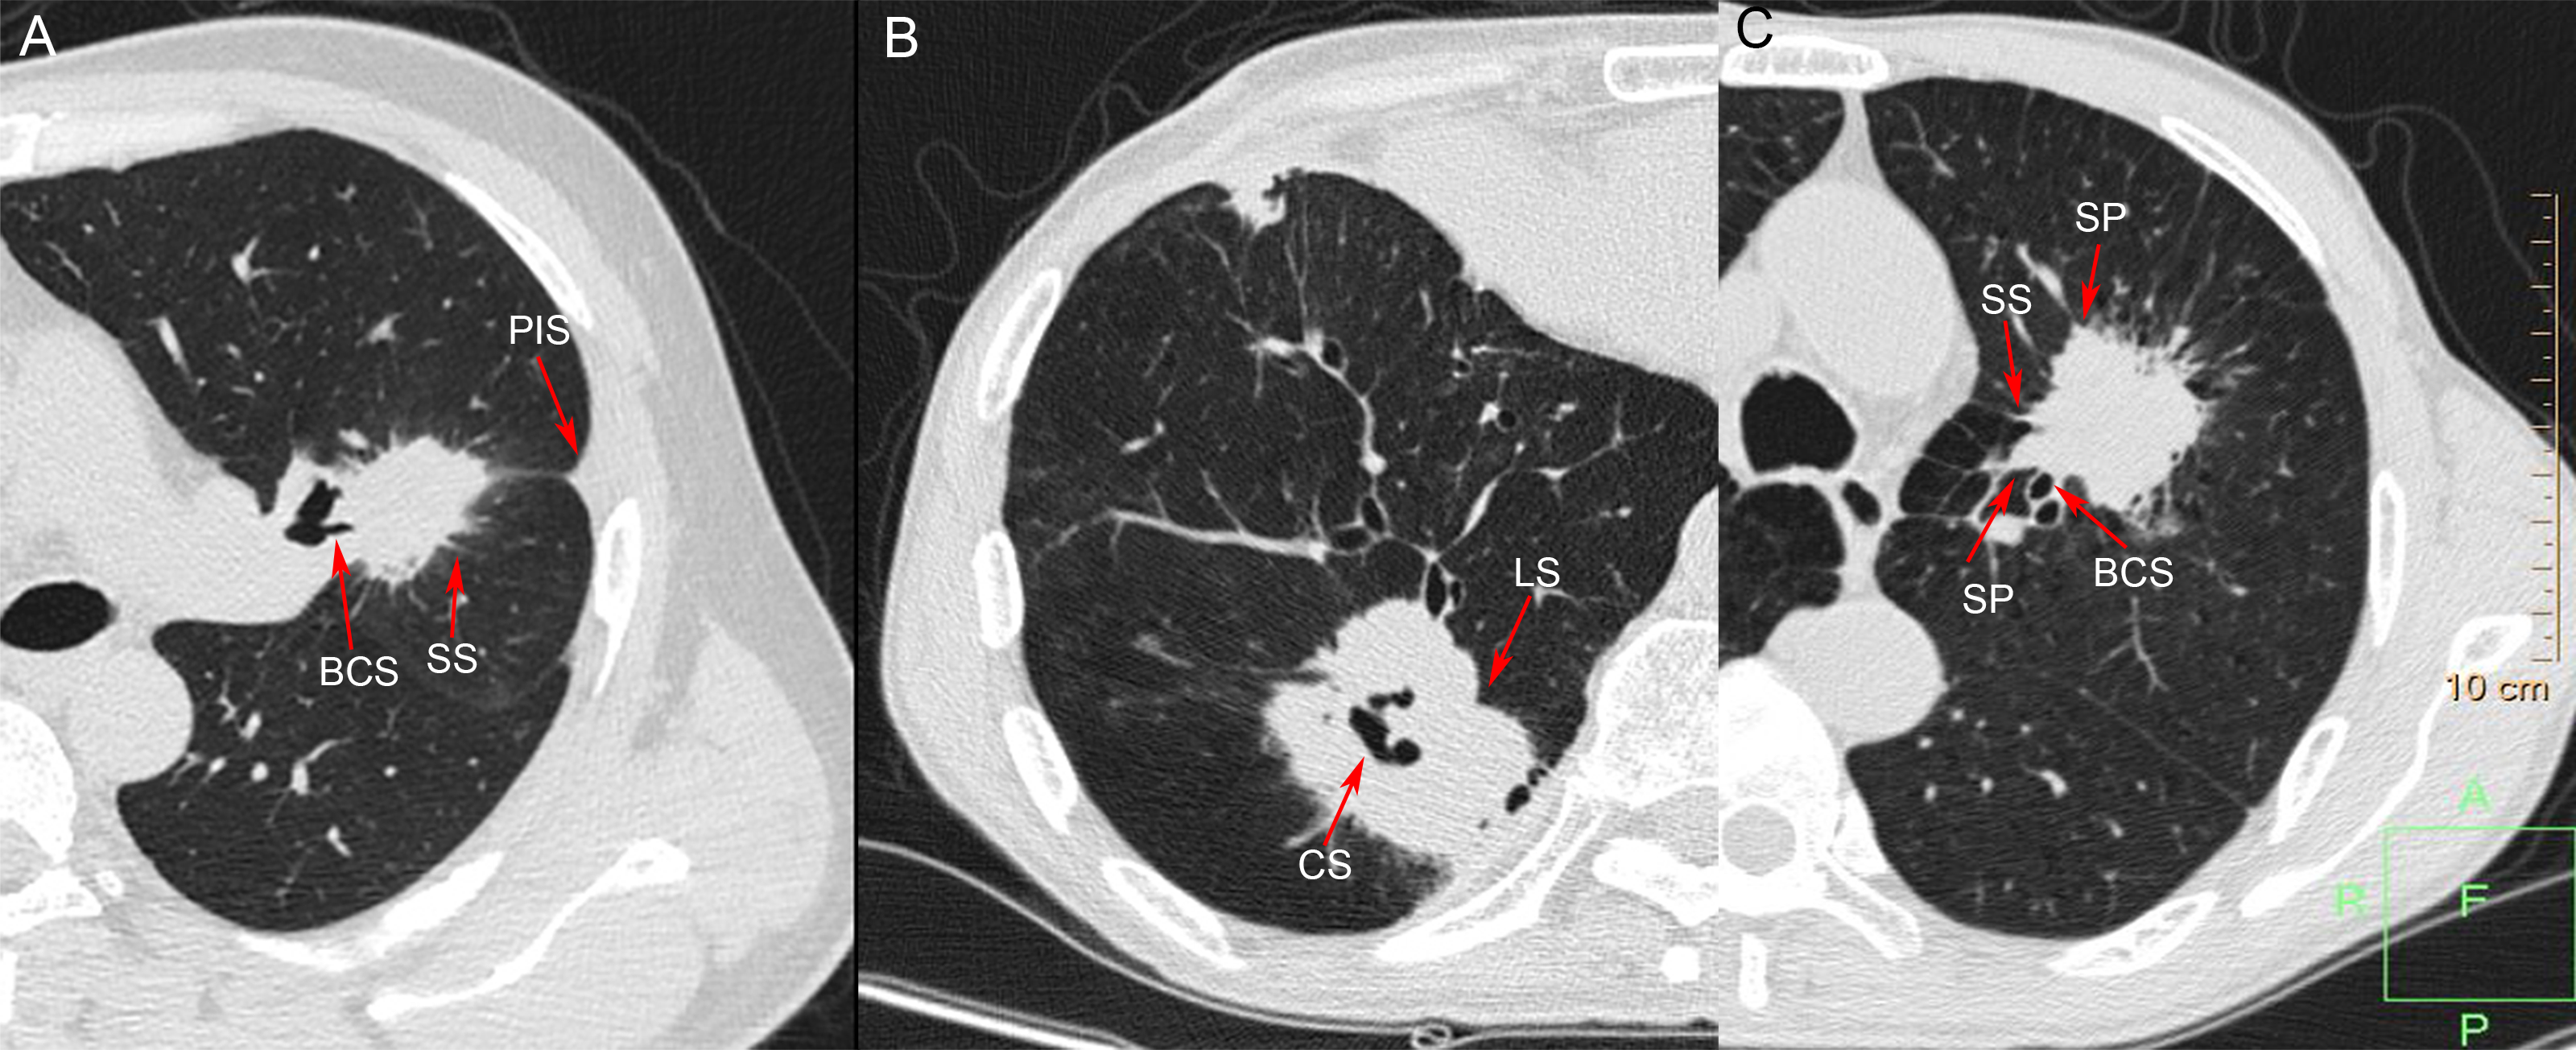


**Figure S2. Calibration curves of the three nomogroms in the training cohort.** (A-C) the clinical nomogrom, the imaging nomogrom, and the combined nomogrom in the training cohort, respectively. Estimated risk of COPD is plotted on the x-axis; the observed outcome of COPD is plotted on the y-axis. The diagonal dotted line represents a perfect prediction by an ideal model. The solid line represents the performance of the nomogram in which a closer fit to the diagonal dotted line represents a better estimation.


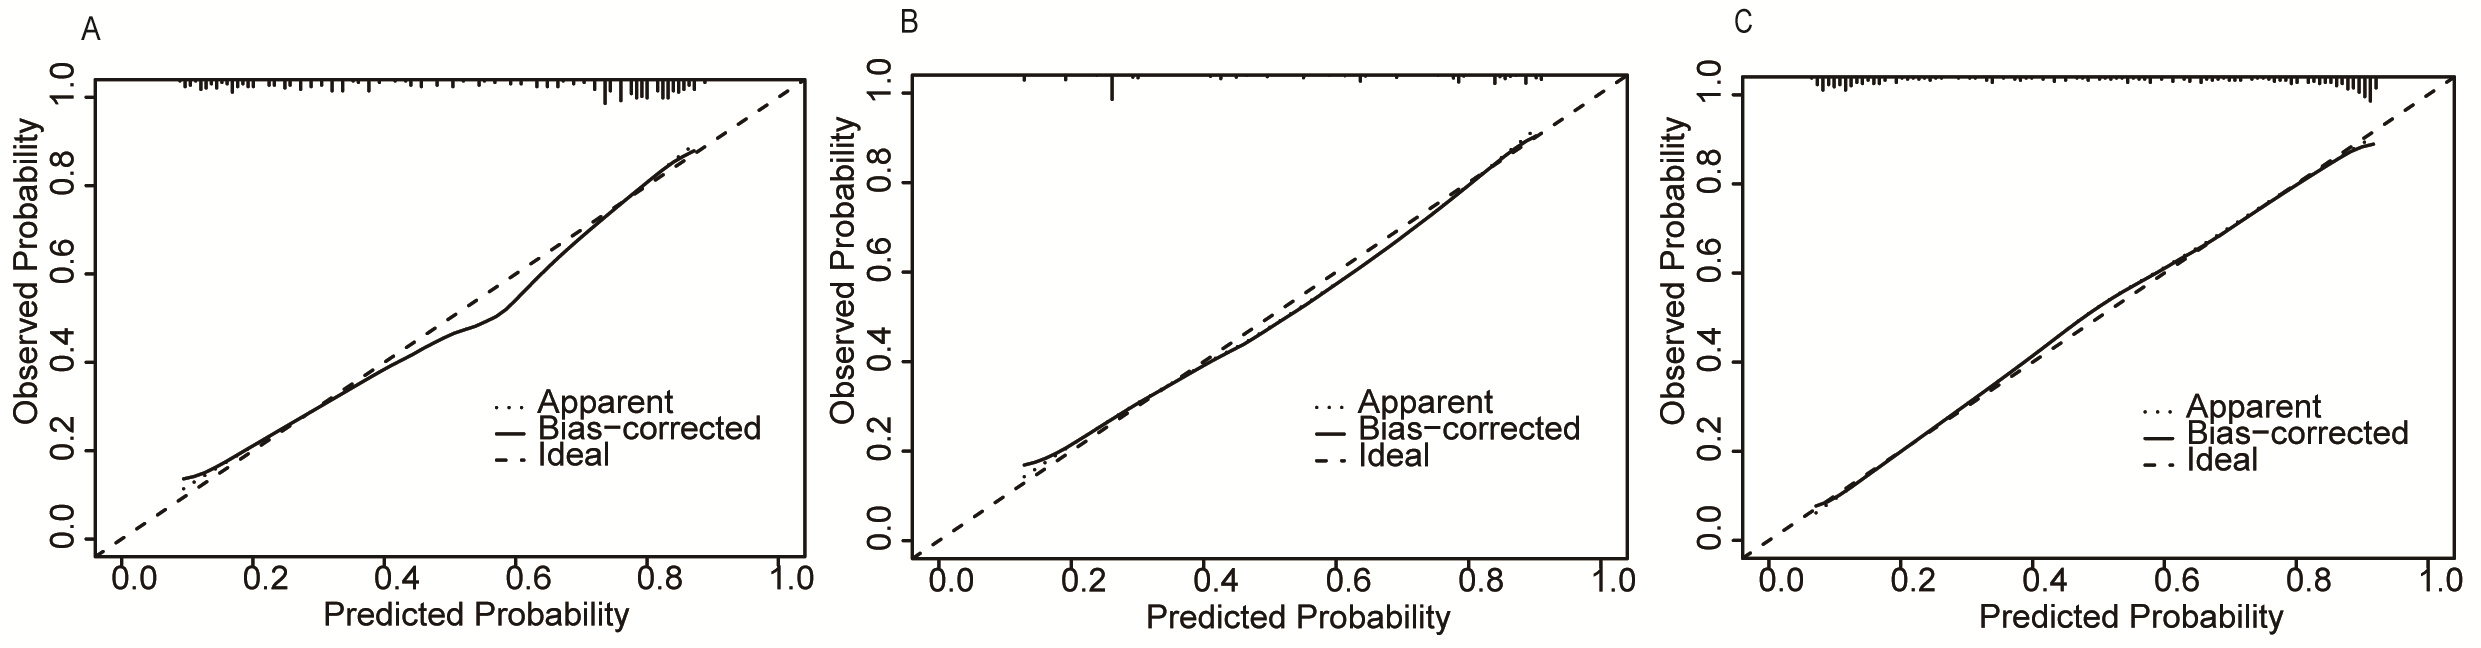

Supplement: Supplementary file 1 [file get_supplementary_file.php]
